# Supplementary material for: Exploiting Leishmania—Primed Dendritic Cells as Potential Immunomodulators of Canine Immune Response
Source: MDPI journal article supplement (doi:10.3390/cells13050445), 2024-03-03
Supplement: s1 [file s1]

**Table S1.** Fluorochrome panel of monoclonal antibodies used to immunophenotype moDCs.

| Laser               | 488 nm                  |                       |                           |                          | 640 nm                  |                       |
|---------------------|-------------------------|-----------------------|---------------------------|--------------------------|-------------------------|-----------------------|
| Emission filters    | 525/40                  | 585/42                | 525/40                    | 585/42                   | 665/20                  | 660/20                |
| Fluorochrome        | FITC                    | PE                    | FITC                      | PE                       | APC                     | Alexa Fluor® 647      |
| Relative Brightness | 3                       | 5                     | 3                         | 5                        | 4                       | 4                     |
| Biomarker           | CD14                    | CD83                  | MHC II                    | HLA ABC                  | CD11c                   | CD1a                  |
| Monoclonal antibody | Mouse anti-Human CD14   | Mouse anti-Human CD83 | Rat anti-Dog MHC Class II | Mouse anti-Human HLA ABC | Mouse anti-Human CD11c  | Mouse anti-Human CD1a |
| Clone               | TuK4                    | HB15e                 | YKIX334.2                 | W6/32                    | BU15                    | NA1/34-HLK            |
| Company             | ThermoFisher Scientific | Invitrogen            | Bio-Rad                   | Bio-Rad                  | ThermoFisher Scientific | Bio-Rad               |

**Table S2.** List of forward (FW) and reverse (RV) primers, base-pair number (bp) of amplified fragments, and primer annealing temperature (TAN) for each gene studied. \* indicates the primers designed with Primer3 software.

Sauter S.N.; Allenspach K.; Gaschen F.; Gröne A.; Ontsouka E.; Blum J.W. Cytokine expression in an *ex vivo* culture system of duodenal samples from dogs with chronic enteropathies: modulation by probiotic bacteria. *Domest Anim Endocrinol.* 2005, 29, 605-622. doi: 10.1016/j.domaniend.2005.04.006

|          | Primer                                                                        | Reference              | Fragment size (bp) | TA (°C) |
|----------|-------------------------------------------------------------------------------|------------------------|--------------------|---------|
| β-Actin  | FW-5'ACGGAGCGTGGCTACAGC3'<br>RW-5'TCCTTGATGTCACGCACGA3'                       | Sauter et al., 2005    | 61                 | 60.5    |
| TLR2     | FW-5'AATCCCCCGTTCAAGTTGTG3'<br>RW-5'ATGGTTTTGCGGCTCTTCTC 3'                   | Ishii et al.,2006      | 101                | 61      |
| TLR4     | FW-5'AGAGGATTTCCCCATTGGAC3'<br>RW-5'ACGCAGGTAGCTTGAAGGAA3'                    | *                      | 86                 | 56      |
| TLR9     | FW-5'ACCACATCATCACCCCTGGCACCT3'<br>RW-5' CGGCGACAGTTCCCACCCAC 3'              | Rodrigues et al., 2017 | 82                 | 64      |
| NOD1     | FW-5' CCTTGGCTGTCTGGAGATTGGCT 3'<br>RW-5' ACCTGCTTACTGGGTCTGGTGT 3'           | Rodrigues et al., 2017 | 82                 | 61      |
| NOD2     | FW-5' TGGCGTGGGAGCAGGGTTTC 3'<br>RW-5' CGCTGGGAGGATGTGAAGATGG 3'              | Rodrigues et al., 2017 | 76                 | 66      |
| NLRP10   | FW-5'CCATGAGTGTGCGTGGATAC3'<br>RW-5'TGTGCAAGGGTGTGTTTCAT3'                    | *                      | 73                 | 57      |
| CD80     | FW-5'GCAGCAGAAGCCATGGATTAC3'<br>RW-5'CACCAAGAGCTGAGAGACCTTGA3'                | Yasunaga et al., 2003  | 84                 | 60      |
| CD86     | FW-5'CGAAACCCACCCCTGATG3'<br>RV-5'CACAAAATGACCAACATTACAAGCA3'                 | Yasunaga et al., 2003  | 70                 | 60      |
| TGF-β    | FW-5'CAGAATGGCTGTCTTTGATGTC3'<br>RW-5'AGGCGAAAGCCCTCGACTT3'                   | Huang, 2008            | 79                 | 60      |
| IL-10    | FW-5'CAAGCCCTGTCTGGAGATGAT3'<br>RW-5'CTTGATGTCTGGGTCGTGGTT3'                  | Yu et al., 2010        | 78                 | 54      |
| IL-12p35 | FW-5'ATGACGGTCCTGTGCCTTAG3'<br>RW-5'CTGCCTCTTGGGATCCATTA3'                    | *                      | 102                | 57      |
| IL-12p40 | FW-5'CAGCAGAGAGGGTCAGAGTGG3'<br>RW-5'ACGACCTCGATGGGTAGGC3'                    | Peters et al., 2005    | 109                | 58      |
| IL-1α    | FW-5'GTTGTTCATTGCCACACAGG3'<br>RW-5'CAAGGCTGGGTTTCCAGTAA3'                    | *                      | 93                 | 56      |
| IL-1β    | Fw-5'CCATGAGTGTGCGTGGATAC3'<br>Rv-5'TGTGCAAGGGTGTGTTTCAT3'                    | *                      | 80                 | 60.5    |
| IL-8     | FW-5'CACTCCACACCTTTCCATCC3'<br>RW-5'GTCCAGGCACACCTCATTTC3'                    | Harman et al., 2014    | 120                | 60      |
| IL-18    | FW-5'CTCTCCTGTAAGAACAATACTATTTTCCTT3'<br>RW-5'GAACACTTCTCTGAAAGAATATGATGTCA3' | Argyle et al., 1999    | 100                | 56      |

- Ishii M.; Hashimoto M.; Oguma K.; Kano R.; Moritomo T.; Hasegawa A. Molecular cloning and tissue expression of canine Toll-like receptor 2 (TLR2). *Vet Immunol Immunopathol.* **2006**, 110, 87-95. doi: 10.1016/j.vetimm.2005.09.007.
- Rodrigues A.; Claro M.; Alexandre-Pires G.; Santos-Mateus D.; Martins C.; Valério-Bolas A.; Rafael-Fernandes M.; Pereira M.A.; Pereira da Fonseca I.; Tomás A.M.; Santos-Gomes G. *Leishmania infantum* antigens modulate memory cell subsets of liver resident T lymphocytes. *Immunobiology* **2017**, 222, 409-422. doi: 10.1016/j.imbio.2016.08.009.
- Yasunaga S.; Masuda K.; Ohno K.; Tsujimoto H. Antigen-specific enhancements of CD80 mRNA expression in experimentally sensitized dogs with Japanese cedar pollen. *J Vet Med Sci.* **2003**, 65, 295-300. doi: 10.1292/jvms.65.295
- Huang Y.C.; Hung S.W.; Jan T.R.; Liao K.W.; Cheng C.H.; Wang Y.S.; Chu R.M. CD5-low expression lymphocytes in canine peripheral blood show characteristics of natural killer cells. *J Leukoc Biol.* **2008**, 84, 1501-1510. doi: 10.1189/jlb.0408255
- Yu D.H.; Noh D.H.; Song R.H.; Park J. Ethyl pyruvate downregulates tumor necrosis factor alpha and interleukin (IL)-6 and upregulates IL-10 in lipopolysaccharide-stimulated canine peripheral blood mononuclear cells. *J Vet Med Sci.* **2010**, 72, 1379–1381. doi: 10.1292/jvms.09-0590
- Peters I.R.; Helps C.R.; Calvert E.L.; Hall E.J.; Day M.J. Cytokine mRNA quantification in histologically normal canine duodenal mucosa by real-time RT-PCR. *Vet Immunol Immunopathol.* **2005**, 103, 101-111. doi: 10.1016/j.vetimm.2004.08.020
- Harman R.M.; Bussche L.; Ledbetter E.C.; Van de Walle G.R. Establishment and characterization of an air-liquid canine corneal organ culture model to study acute herpes keratitis. *J Virol.* **2014**, 88, 13669–13677. <https://doi.org/10.1128/JVI.02135-14>
- Argyle D.J.; McGillivray C.; Nicolson L.; Onions D.E. Cloning, sequencing, and characterization of dog interleukin-18. *Immunogenetics* **1999**, 49, 541-543. doi: 10.1007/s002510050532.

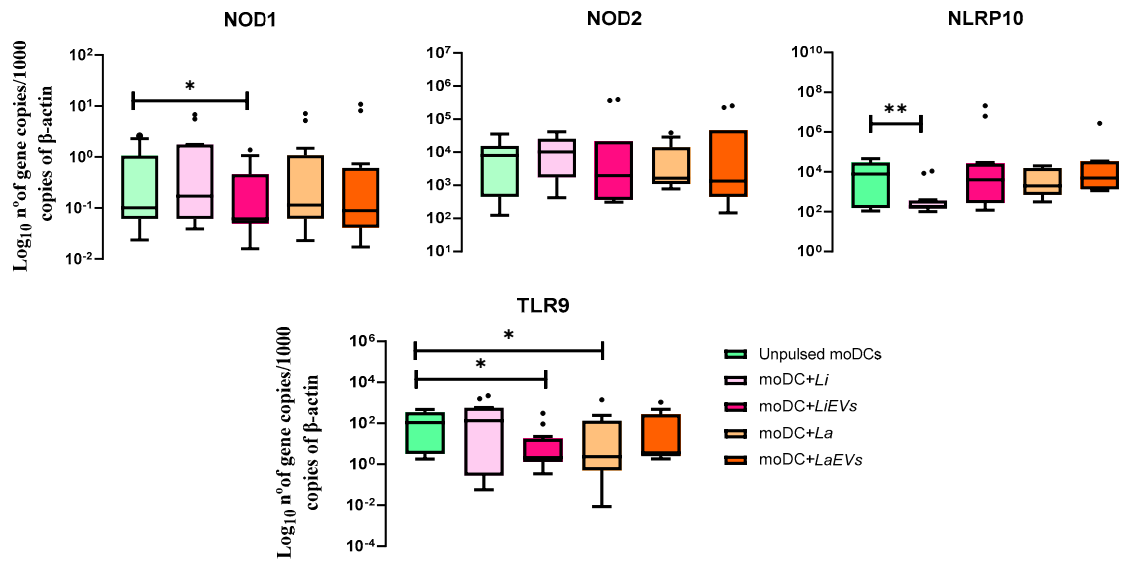

**Figure S1.** Gene expression of NOD1, NOD2, NLRP10, and TLR9 by *L. infantum* and *L. amazonensis* infected moDCs. RNA extracted from infected moDCs (moDC+Li and moDC+La) and moDCs exposed to parasite EVs (moDCs+LiEVs and moDCs+LaEVs) for 24 hours were used to evaluate NOD1, NOD2, NLRP10, and TLR9 gene expression. Results of at least eight samples are represented by box plots, including the median, interquartile ranges, and minimum and maximum values. Black dots are indicative of outliers. Nonparametric Wilcoxon's test was used for statistical comparisons. \* ( $p<0.05$ ) indicates statistically significant differences.

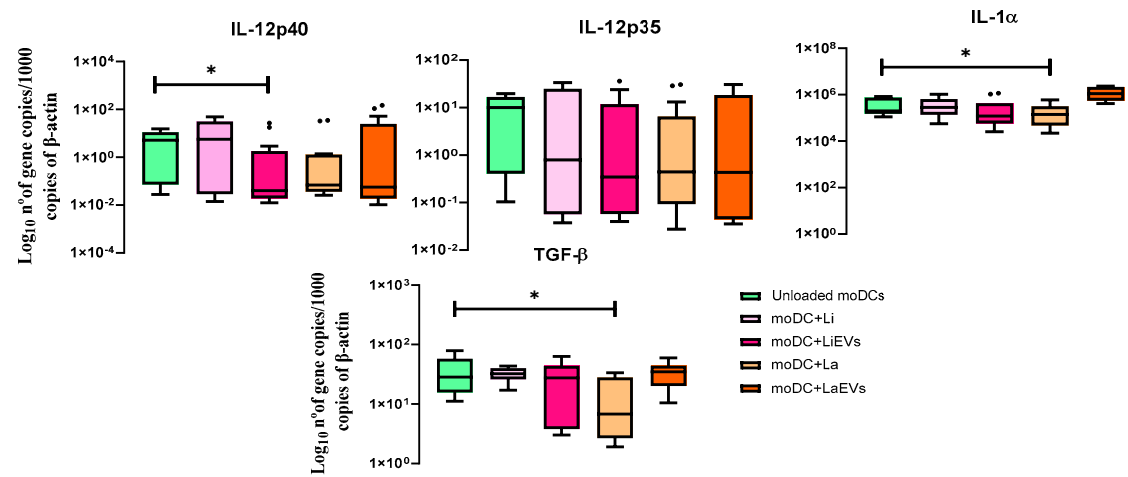

**Figure S2.** Gene expression of cytokines by *L. infantum* and *L. amazonensis* infected moDCs. RNA extracted from infected moDCs (moDC+Li and moDC+La) and moDCs exposed to (moDCs+LiEVs and moDCs+LaEVs) for 24 hours were used to evaluate *IL-12p40*, *IL-12p35*, *IL-1α*, and *TGF-β* gene expression. In parallel, cytokines of unloaded moDCs were also assessed. The results of at least 10 samples are represented by box plots, including the median, interquartile ranges, and minimum and maximum values. Black dots are indicative of outliers. Nonparametric Wilcoxon's test was used for statistical comparisons. \*( $p < 0.05$ ) indicates significant differences.
